# Supplementary material for: Water-Soluble Lignins from Different Bioenergy Crops Stimulate the Early Development of Maize (Zea mays, L.)
Source: PubMed Central journal article supplement (PMC6332221; doi:10.3390/molecules201119671), 2015-11-05
Supplement: molecules-20-19671-s001.pdf [file molecules-20-19671-s001.pdf]

## Supplementary Informations

**Table S1.** Raw data for the lengths (cm) of radicle root, lateral seminal roots and coleoptile of maize seedlings treated with different concentrations of lignins isolated from CAR.

| CAR                        |              |                            |                       |                            |            |
|----------------------------|--------------|----------------------------|-----------------------|----------------------------|------------|
| Lignin Concentration (ppm) | Radicle Root | Lignin Concentration (ppm) | Lateral Seminal Roots | Lignin Concentration (ppm) | Coleoptile |
| 0 (control)                | 6.173        | 0 (control)                | 5.088                 | 0 (control)                | 2.034      |
|                            | 8.166        |                            | 6.636                 |                            | 3.705      |
|                            | 1.1          |                            | 5.212                 |                            | 3.279      |
|                            | 7.105        |                            | 2.803                 |                            | 1.779      |
|                            | 1.201        |                            | 6.043                 |                            | 5.199      |
|                            | 7.956        |                            | 5.716                 |                            | 3.436      |
|                            | 6.081        |                            | 8.588                 |                            | 2.695      |
|                            | 11.787       |                            | 8.89                  |                            | 4.12       |
|                            | 11.7         |                            | 9.384                 |                            | 6.442      |
|                            | 7            |                            | 4.281                 |                            | 5.45       |
|                            | 12.1         |                            | 4.552                 |                            | 3.741      |
|                            | 6.601        |                            | 10.429                |                            | 5.335      |
|                            | 8.735        |                            | 4.84                  |                            | 3.531      |
|                            | 11.964       |                            | 10.407                |                            | 4.796      |
|                            | 8.019        |                            | 9.274                 |                            | 5.279      |
|                            | 6.109        |                            | 5.111                 |                            | 4.425      |
|                            | 4.764        |                            | 5.958                 |                            | 2.567      |
|                            | 4.78         |                            | 5.146                 |                            | 2.433      |
|                            | 0.9          |                            | 4.437                 |                            | 3.218      |
|                            | 1.036        |                            | 3.025                 |                            | 2.702      |
| 6.767                      | 6.254        | 2.29                       |                       |                            |            |
| 5.599                      | 1.32         | 3.951                      |                       |                            |            |
| 3.213                      | 4.094        | 2.599                      |                       |                            |            |
| 6.585                      | 3.66         | 2.557                      |                       |                            |            |
| 0.1                        | 1.989        | 0.1                        | 9.943                 | 0.1                        | 5.989      |
|                            | 6.835        |                            | 8.962                 |                            | 3.281      |
|                            | 9.159        |                            | 7.048                 |                            | 4.619      |
|                            | 4.402        |                            | 10.685                |                            | 6.922      |
|                            | 5.481        |                            | 7.64                  |                            | 7.801      |
|                            | 6.057        |                            | 7.372                 |                            | 7.727      |
|                            | 6.451        |                            | 8.104                 |                            | 7.334      |
|                            | 5.717        |                            | 9.697                 |                            | 6.993      |
|                            | 6.157        |                            | 8.753                 |                            | 5.647      |
|                            | 4.753        |                            | 9.603                 |                            | 6.068      |
|                            | 8.998        |                            | 7.829                 |                            | 6.786      |
|                            | 6.697        |                            | 7.055                 |                            | 7.512      |
|                            | 8.499        |                            | 8.754                 |                            | 7.258      |
|                            | 5.15         |                            | 5.705                 |                            | 5.147      |
|                            | 5.714        |                            | 5.034                 |                            | 5.624      |
|                            | 4.452        |                            | 1.84                  |                            | 4.834      |
|                            | 4.449        |                            | 2.915                 |                            | 2.15       |
|                            | 1.798        |                            | 3.299                 |                            | 4.293      |
|                            | 1.501        |                            | 2.992                 |                            | 3.339      |
|                            | 4.774        |                            | 2.809                 |                            | 4.159      |
| 1.662                      | 6.07         | 4.028                      |                       |                            |            |
| 9                          | 4.096        | 3.721                      |                       |                            |            |
| 1.66                       | 3.687        | 4.328                      |                       |                            |            |
| 1                          | 7.53         | 1                          | 12.35                 | 1                          | 6.29       |
|                            | 7.58         |                            | 3.95                  |                            | 5.937      |
|                            | 7.34         |                            | 6.92                  |                            | 6.233      |
|                            | 10.91        |                            | 10.74                 |                            | 6.184      |
|                            | 5.63         |                            | 6.64                  |                            | 5.49       |

|     |        |     |       |       |
|-----|--------|-----|-------|-------|
|     | 12.01  |     | 7.14  | 6.12  |
|     | 11.65  |     | 11.31 | 6.213 |
|     | 4.27   |     | 3.66  | 6.569 |
|     | 5.81   |     | 5.47  | 7.267 |
|     | 6.34   |     | 5.7   | 7.245 |
|     | 1.1    |     | 6.27  | 5.193 |
|     | 5.38   |     | 5.85  | 4.055 |
|     | 6.43   |     | 9.41  | 3.122 |
|     | 5.13   |     | 6.78  | 4.408 |
|     | 4.56   |     | 5.88  | 4.495 |
|     | 6.64   |     | 8.24  | 3.941 |
|     | 8.32   |     | 4.22  | 5.384 |
|     | 7.4    |     | 6.81  | 4.011 |
|     | 6.92   |     | 11.93 | 6.127 |
|     | 1.09   |     | 6.62  | 2.573 |
|     | 6.01   |     | 4.23  | 2.391 |
|     | 5.91   |     | 7.27  | 4.833 |
|     | 0.99   |     | 2.87  | 6.093 |
|     | 5.58   |     | 3.11  | 5.883 |
|     | 6.59   |     | 3.23  | 5.838 |
|     | 0.5    |     | 3.66  | 6.213 |
|     | 6.33   |     | 5.19  | 6.304 |
|     | 6.07   |     | 5.35  | 3.567 |
|     | 0.39   |     | 5.44  | 2.126 |
|     | 0.8    |     | 6.47  | 7.016 |
|     | 6.7    |     | 6.9   | 4.535 |
|     | 6.89   |     | 6.91  | 5.95  |
|     | 7.78   | 10  | 7.26  | 7.074 |
|     | 12.001 |     | 8.49  | 6.313 |
|     | 8.68   |     | 9.24  | 5.679 |
| 10  | 8.82   |     | 12.27 | 3.474 |
|     | 7.59   |     | 12.43 | 9.116 |
|     | 12.411 |     | 12.93 | 8.968 |
|     | 12.001 |     | 13.21 | 4.575 |
|     | 6.7    |     | 13.24 | 3.893 |
|     | 8.01   |     | 13.29 | 6.288 |
|     | 8.61   |     | 7.02  | 6.549 |
|     | 5.35   |     | 4.67  | 6.818 |
|     | 6.31   |     | 3.46  | 8.46  |
|     | 11.84  |     | 6.96  | 7.537 |
|     | 6.09   |     | 5.39  | 6.944 |
|     | 6.27   |     | 1.1   | 5.076 |
|     | 4.95   |     | 4.94  | 6.872 |
|     | 3.97   |     | 3.59  | 7.957 |
|     | 0.746  |     | 6.2   | 7.402 |
|     | 5.2    |     | 8.96  | 7.645 |
|     | 4.64   |     | 6.62  | 7.6   |
|     | 1.242  |     | 3.63  | 4.598 |
|     | 0.717  | 100 | 5.19  | 6.984 |
|     | 8.5    |     | 5.22  | 5.411 |
|     | 5.11   |     | 3.85  | 5.995 |
|     | 4.89   |     | 4.28  | 6.739 |
| 100 | 0.654  |     | 10.03 | 5.218 |
|     | 1.302  |     | 6.95  | 3.217 |
|     | 5.01   |     | 5.44  | 3.381 |
|     | 3.94   |     | 5.08  | 3.853 |
|     | 4.31   |     | 4.74  | 3.341 |
|     | 5.51   |     | 4.9   | 4.456 |
|     | 9.146  |     | 6.43  | 4.242 |
|     | 6.28   |     | 7.64  | 4.457 |
|     | 4.7    |     | 11.06 | 4.468 |
|     | 9.056  |     |       | 3.929 |

|       |       |
|-------|-------|
| 6.3   | 3.66  |
| 8.56  | 4.749 |
| 4.31  | 4.284 |
| 9.003 | 6.224 |
| 4.17  | 3.575 |
|       | 4.939 |
|       | 5.354 |
|       | 6.401 |
|       | 4.808 |
|       | 4.381 |
|       | 4.329 |

**Table S2.** Raw data for the lengths (cm) of radicle root, lateral seminal roots and coleoptile of maize seedlings treated with different concentrations of lignins isolated from EUC.

| EUC                        |              |                            |                       |                            |            |
|----------------------------|--------------|----------------------------|-----------------------|----------------------------|------------|
| Lignin concentration (ppm) | Radicle root | Lignin concentration (ppm) | Lateral Seminal Roots | Lignin concentration (ppm) | Coleoptile |
|                            | 7.4          |                            | 14.2                  |                            | 7.44       |
|                            | 7.75         |                            | 16.05                 |                            | 8.14       |
|                            | 8.85         |                            | 18.98                 |                            | 8.36       |
|                            | 9.16         |                            | 21.01                 |                            | 7.31       |
|                            | 9.43         |                            | 21.74                 |                            | 8.68       |
|                            | 9.89         |                            | 23.15                 |                            | 8.89       |
|                            | 10.97        |                            | 23.26                 |                            | 7.41       |
|                            | 11.69        |                            | 24.48                 |                            | 9.12       |
|                            | 7.11         |                            | 6.34                  |                            | 9.31       |
|                            | 7.73         |                            | 8.62                  |                            | 7.68       |
|                            | 9.49         |                            | 11.34                 |                            | 7.79       |
| 0 (control)                | 9.85         | 0 (control)                | 14.3                  |                            | 8.13       |
|                            | 10.1         |                            | 22.52                 | 0 (control)                | 8.32       |
|                            | 11.14        |                            | 23.5                  |                            | 8.56       |
|                            | 12.73        |                            | 24.79                 |                            | 8.98       |
|                            | 11.02        |                            | 16.79                 |                            | 8.98       |
|                            | 11.32        |                            | 19.83                 |                            | 8.31       |
|                            | 11.46        |                            | 20.49                 |                            | 8.34       |
|                            | 12.65        |                            | 21.08                 |                            | 8.34       |
|                            | 12.86        |                            | 21.68                 |                            | 8.47       |
|                            | 13.58        |                            | 22.43                 |                            | 8.48       |
|                            | 13.8         |                            | 23.97                 |                            | 8.9        |
|                            | 14.51        |                            | 25.29                 |                            | 9.46       |
|                            | 14.77        |                            | 28.94                 |                            | 9.52       |
|                            | 8.03         |                            | 14.25                 |                            | 9.54       |
|                            | 8.94         |                            | 16.19                 |                            | 9.56       |
| 0.1                        | 9.57         | 0.1                        | 18.79                 |                            | 8.27       |
|                            | 10.38        |                            | 18.88                 |                            | 8.41       |
|                            | 11.67        |                            | 19.44                 | 0.1                        | 8.58       |
|                            | 11.75        |                            | 20.07                 |                            | 8.91       |
|                            | 11.87        |                            | 20.46                 |                            | 9.15       |
|                            | 12.28        |                            | 21.23                 |                            | 9.18       |
|                            | 12.62        |                            | 24.59                 |                            | 9.33       |
|                            | 6.61         |                            | 16.13                 |                            | 9.43       |
|                            | 9.52         |                            | 16.44                 |                            | 7.45       |
|                            | 9.52         |                            | 17.02                 |                            | 7.81       |
| 1                          | 9.54         | 1                          | 17.37                 |                            | 8.58       |
|                            | 11.95        |                            | 18.59                 | 1                          | 9.03       |
|                            | 12           |                            | 18.69                 |                            | 9.15       |
|                            | 12.17        |                            | 20.28                 |                            | 9.3        |
|                            | 13.8         |                            | 24.68                 |                            | 9.55       |
|                            | 6.61         |                            | 5.58                  |                            | 9.89       |
| 10                         | 6.85         | 10                         | 10.75                 | 10                         | 8.73       |
|                            |              |                            |                       |                            | 8.69       |

|     |       |     |       |     |      |
|-----|-------|-----|-------|-----|------|
|     | 8.75  |     | 11.13 |     | 2.51 |
|     | 9.26  |     | 11.47 |     | 9.28 |
|     | 9.26  |     | 16.97 |     | 9.48 |
|     | 9.76  |     | 17.39 |     | 9.29 |
|     | 9.94  |     | 18.5  |     | 8.81 |
|     | 11.91 |     | 23.87 |     | 8.85 |
|     | 13.42 |     | 28.54 |     | 7.64 |
|     | 8.1   |     | 14.45 |     | 9.48 |
|     | 8.59  |     | 14.76 |     | 6.88 |
|     | 9.19  |     | 20.94 |     | 7.48 |
|     | 9.32  |     | 21.21 |     | 7.78 |
|     | 9.62  |     | 22.23 |     | 7.92 |
|     | 9.66  |     | 23.91 |     | 8.16 |
|     | 11.62 |     | 24.83 |     | 8.66 |
|     | 13.62 |     | 25.33 |     | 8.67 |
|     | 9.15  |     | 21.23 |     | 7.9  |
|     | 15.07 |     | 22.88 |     | 7.91 |
|     | 6.99  |     | 6.34  |     | 8.33 |
|     | 11.97 |     | 22.5  |     | 8.38 |
| 100 | 6.97  | 100 | 22.07 | 100 | 8.4  |
|     | 10.6  |     | 26.22 |     | 8.83 |
|     | 13.61 |     | 24.02 |     | 8.92 |
|     | 11.4  |     | 23.97 |     | 9.33 |
|     | 12.99 |     | 27.24 |     | 9.4  |
|     | 11.31 |     | 28.82 |     | 7.71 |
|     | 12.47 |     | 22.51 |     | 7.76 |
|     | 13.87 |     | 16.42 |     | 7.86 |
|     | 11.98 |     | 19.29 |     | 8.22 |
|     | 9.17  |     | 20.89 |     | 8.32 |
|     | 6.49  |     | 9.04  |     | 8.37 |
|     | 7.34  |     | 26.03 |     | 8.49 |
|     | 9.86  |     | 11.03 |     | 9.21 |
|     | 11.3  |     | 21.6  |     | 9.22 |

**Table S3.** Raw data for the lengths (cm) of radicle root, lateral seminal roots and coleoptile of maize seedlings treated with different concentrations of lignins isolated from RIP.

| RIP                        |              |                            |                       |                            |            |
|----------------------------|--------------|----------------------------|-----------------------|----------------------------|------------|
| Lignin concentration (ppm) | Radicle root | Lignin concentration (ppm) | Lateral Seminal Roots | Lignin concentration (ppm) | Coleoptile |
|                            | 6.339        |                            | 2.126                 |                            | 2.077      |
|                            | 3.191        |                            | 2.25                  |                            | 2.228      |
|                            | 4.742        |                            | 2.85                  |                            | 2.484      |
|                            | 7.134        |                            | 3.129                 |                            | 2.676      |
|                            | 6.917        |                            | 4.454                 |                            | 2.976      |
|                            | 3.752        |                            | 5.282                 |                            | 3.605      |
|                            | 2.439        |                            | 5.419                 |                            | 4.52       |
|                            | 6.267        |                            | 6.005                 |                            | 4.815      |
|                            | 6.165        |                            | 6.044                 |                            | 4.854      |
|                            | 4.913        |                            | 6.084                 |                            | 4.982      |
| 0 (control)                | 3.693        | 0 (control)                | 6.566                 | 0 (control)                | 5.238      |
|                            | 3.717        |                            | 6.959                 |                            | 5.294      |
|                            | 2.919        |                            | 7.028                 |                            | 5.459      |
|                            | 2.767        |                            | 8.076                 |                            | 5.601      |
|                            | 4.938        |                            | 8.635                 |                            | 5.61       |
|                            | 5.749        |                            | 8.971                 |                            | 5.625      |
|                            | 6.379        |                            | 9.735                 |                            | 5.675      |
|                            | 4.61         |                            | 9.742                 |                            | 5.714      |
|                            | 5.143        |                            | 10.101                |                            | 5.734      |
|                            | 5.483        |                            | 10.431                |                            | 5.751      |
|                            | 4.019        |                            | 10.735                |                            | 5.927      |

|     |        |     |        |     |       |
|-----|--------|-----|--------|-----|-------|
|     | 3.347  |     | 10.823 |     | 5.967 |
|     | 8.583  |     | 11.308 |     | 6.012 |
|     | 7.042  |     | 11.761 |     | 6.024 |
|     | 7.49   |     | 12.051 |     | 6.208 |
|     | 5.872  |     | 12.067 |     | 6.266 |
|     | 6.813  |     | 12.932 |     | 6.543 |
|     | 9.2    |     | 13.577 |     | 6.58  |
|     | 3.193  |     | 14.001 |     | 6.674 |
|     | 8.216  |     | 4.579  |     | 6.776 |
|     | 8.682  |     | 6.6    |     | 4.147 |
|     | 6.688  |     | 6.862  |     | 4.2   |
|     | 3.714  |     | 7.331  |     | 4.526 |
|     | 9.73   |     | 7.814  |     | 4.537 |
|     | 10.535 |     | 8.015  |     | 4.711 |
|     | 6.944  |     | 8.498  |     | 4.718 |
|     | 6.825  |     | 8.611  |     | 4.722 |
|     | 5.093  |     | 8.781  |     | 4.751 |
|     | 8.169  |     | 8.909  |     | 4.958 |
|     | 6.164  |     | 8.967  |     | 5.12  |
|     | 7.957  |     | 8.991  |     | 5.141 |
|     | 7.02   |     | 9.393  |     | 5.156 |
|     | 7.064  |     | 9.627  |     | 5.267 |
|     | 9.19   |     | 9.944  |     | 5.307 |
|     | 7.442  |     | 9.972  |     | 5.417 |
|     | 3.126  | 0.1 | 11.102 | 0.1 | 5.419 |
|     | 6.373  |     | 11.297 |     | 5.426 |
|     | 9.237  |     | 11.346 |     | 5.428 |
|     | 8.383  |     | 11.447 |     | 5.517 |
| 0.1 | 6.456  |     | 11.519 |     | 5.58  |
|     | 3.373  |     | 11.959 |     | 5.585 |
|     | 3.252  |     | 12.083 |     | 5.745 |
|     | 6.763  |     | 12.365 |     | 5.763 |
|     | 8.459  |     | 14.247 |     | 5.809 |
|     | 7.531  |     | 14.458 |     | 5.888 |
|     | 7.531  |     | 14.681 |     | 5.932 |
|     | 6.601  |     | 15.314 |     | 5.979 |
|     | 7.07   |     | 15.46  |     | 5.979 |
|     | 8.112  |     | 15.658 |     | 6.091 |
|     | 8.382  |     | 15.968 |     | 6.242 |
|     | 8.112  |     | 18.002 |     | 6.468 |
|     | 3.64   |     | 18.879 |     | 6.62  |
|     | 4.875  |     | 3.394  |     | 4.212 |
|     | 5.657  |     | 3.563  |     | 4.39  |
|     | 4.76   |     | 3.799  |     | 4.449 |
|     | 4.865  |     | 4.571  |     | 4.78  |
|     | 6.193  |     | 5.052  |     | 5.001 |
|     | 6.213  |     | 5.429  |     | 5.175 |
|     | 4.948  |     | 5.676  |     | 5.214 |
|     | 6.963  |     | 6.121  |     | 5.262 |
|     | 5.245  |     | 7.272  |     | 5.378 |
|     | 7.204  |     | 7.406  |     | 5.407 |
|     | 5.93   | 1   | 7.645  | 1   | 5.412 |
|     | 6.024  |     | 7.678  |     | 5.47  |
| 1   | 6.601  |     | 7.884  |     | 5.476 |
|     | 6.359  |     | 7.966  |     | 5.6   |
|     | 6.467  |     | 8.533  |     | 5.697 |
|     | 3.633  |     | 9.011  |     | 5.717 |
|     | 3.731  |     | 9.383  |     | 5.745 |
|     | 5.742  |     | 9.517  |     | 5.83  |
|     | 6.865  |     | 9.583  |     | 5.843 |
|     | 6.084  |     | 9.664  |     | 5.855 |
|     | 5.964  |     | 10.114 |     | 5.859 |

|     |        |     |        |     |       |
|-----|--------|-----|--------|-----|-------|
|     | 4.018  |     | 10.654 |     | 5.86  |
|     | 5.081  |     | 10.684 |     | 5.874 |
|     | 5.163  |     | 11.344 |     | 5.898 |
|     | 4.631  |     | 11.758 |     | 6.139 |
|     | 5.01   |     | 12.072 |     | 6.188 |
|     | 6.638  |     | 3.025  |     | 6.225 |
|     | 7.558  |     | 4.289  |     | 6.476 |
|     | 8.096  |     | 6.141  |     | 3.041 |
|     | 6.986  |     | 6.203  |     | 3.21  |
|     | 5.358  |     | 6.427  |     | 3.447 |
|     | 5.781  |     | 7.037  |     | 3.781 |
|     | 5.879  |     | 7.616  |     | 3.878 |
|     | 6.991  |     | 7.829  |     | 4.153 |
|     | 6.717  |     | 7.83   |     | 4.409 |
|     | 6.385  |     | 7.953  |     | 4.493 |
|     | 7.876  |     | 8.234  |     | 4.605 |
|     | 7.008  |     | 8.966  |     | 4.715 |
|     | 6.017  |     | 9.054  |     | 5.007 |
|     | 5.875  | 10  | 9.382  |     | 5.122 |
|     | 6.395  |     | 9.693  |     | 5.434 |
|     | 5.912  |     | 9.989  |     | 5.634 |
|     | 4.563  |     | 10.58  |     | 5.64  |
|     | 5.509  |     | 10.599 |     | 5.662 |
|     | 3.654  |     | 11.133 |     | 5.717 |
|     | 7.752  |     | 11.707 | 10  | 5.72  |
|     | 7.453  |     | 11.994 |     | 5.789 |
|     | 5.427  |     | 12.785 |     | 5.962 |
|     | 5.196  |     | 13.791 |     | 5.981 |
| 10  | 6.887  |     | 13.966 |     | 6.139 |
|     | 8.604  |     | 14.377 |     | 6.145 |
|     | 5.987  |     | 15.108 |     | 6.222 |
|     | 6.279  |     | 15.344 |     | 6.265 |
|     | 6.109  |     | 15.843 |     | 6.45  |
|     | 5.917  |     | 4.014  |     | 6.651 |
|     | 3.622  |     | 4.416  |     | 6.67  |
|     | 7.786  |     | 4.468  |     | 6.833 |
|     | 6.544  |     | 5.138  |     | 6.923 |
|     | 7.811  |     | 5.475  |     | 6.957 |
|     | 8.377  |     | 6.247  |     | 7.008 |
|     | 9      |     | 6.494  |     | 7.103 |
|     | 5.47   |     | 6.814  |     | 7.162 |
|     | 7.29   |     | 6.859  |     | 7.228 |
|     | 8.276  |     | 7.402  |     | 3.188 |
|     | 4.359  |     | 8.562  |     | 3.308 |
|     | 7.753  |     | 8.847  |     | 3.672 |
|     | 5.238  |     | 9.811  |     | 4.395 |
|     | 6.335  |     | 10.089 |     | 4.529 |
|     | 6.232  | 100 | 10.841 |     | 4.696 |
|     | 7.086  |     | 10.849 |     | 4.781 |
|     | 5.427  |     | 11.541 |     | 4.821 |
|     | 7.266  |     | 12.066 |     | 4.931 |
|     | 6.623  |     | 12.156 |     | 5.25  |
|     | 10.685 |     | 12.366 | 100 | 5.335 |
| 100 | 7.03   |     | 13.022 |     | 5.572 |
|     | 8.764  |     | 13.43  |     | 5.733 |
|     | 9.106  |     | 13.841 |     | 5.936 |
|     | 9.408  |     | 14.227 |     | 6.187 |
|     | 9.159  |     | 14.258 |     | 6.403 |
|     | 3.172  |     | 14.38  |     | 6.537 |
|     | 8.945  |     | 14.956 |     | 6.542 |
|     | 8.952  |     | 16.251 |     | 6.572 |
|     | 7.776  |     | 16.402 |     | 6.618 |

|       |       |
|-------|-------|
| 6.8   | 6.638 |
| 9.804 | 6.709 |
| 3.376 | 6.71  |
| 4.06  | 6.771 |
| 7.475 | 6.784 |
| 5.464 | 6.957 |
| 8.127 | 7.023 |
| 4.884 | 7.034 |
| 3.575 | 7.048 |
| 3.194 | 7.054 |
| 6.831 | 7.906 |
| 4.312 |       |
| 8.551 |       |

**Table S4.** Raw data for the lengths (cm) of radicle root, lateral seminal roots and coleoptile of maize seedlings treated with different concentrations of lignins isolated from LIM.

| LIM                        |              |                            |                       |                            |            |
|----------------------------|--------------|----------------------------|-----------------------|----------------------------|------------|
| Lignin concentration (ppm) | Radicle root | Lignin concentration (ppm) | Lateral Seminal Roots | Lignin concentration (ppm) | Coleoptile |
|                            | 7.298        |                            | 2.704                 |                            | 4.426      |
|                            | 5.797        |                            | 7.818                 |                            | 2.999      |
|                            | 6.554        |                            | 11.258                |                            | 2.645      |
|                            | 4.99         |                            | 6.955                 |                            | 4.664      |
|                            | 5.845        |                            | 7.232                 |                            | 6.025      |
|                            | 6.302        |                            | 9.799                 |                            | 5.861      |
|                            | 7.171        |                            | 7.948                 |                            | 4.569      |
|                            | 6.14         |                            | 8.518                 |                            | 5.416      |
|                            | 7.738        |                            | 8.163                 |                            | 4.188      |
|                            | 4.431        |                            | 6.002                 |                            | 5.276      |
|                            | 6.93         |                            | 10.963                |                            | 3.93       |
|                            | 3.619        |                            | 5.975                 |                            | 6.351      |
|                            | 3.601        |                            | 8.623                 |                            | 3.415      |
|                            | 6.054        |                            | 6.092                 |                            | 3.652      |
|                            | 6.413        |                            | 10.615                |                            | 4.604      |
| 0 (control)                | 6.819        | 0 (control)                | 8.676                 |                            | 5.921      |
|                            | 7.92         |                            | 10.309                | 0 (control)                | 4.877      |
|                            | 7.266        |                            | 12.952                |                            | 5.851      |
|                            | 5.818        |                            | 6.46                  |                            | 4.431      |
|                            | 6.638        |                            | 6.077                 |                            | 5.56       |
|                            | 6.098        |                            | 8.224                 |                            | 6.04       |
|                            | 3.41         |                            | 5.758                 |                            | 5.474      |
|                            | 5.734        |                            | 11.137                |                            | 6.417      |
|                            | 9.643        |                            | 15.789                |                            | 6.105      |
|                            | 6.613        |                            | 9.554                 |                            | 6.117      |
|                            | 7.405        |                            | 9.985                 |                            | 6.393      |
|                            | 7.198        |                            | 9.674                 |                            | 4.528      |
|                            | 8.682        |                            | 7.316                 |                            | 7          |
|                            | 7.208        |                            | 6.284                 |                            | 5.942      |
|                            | 7.737        |                            | 6.241                 |                            | 4.966      |
|                            | 6.952        |                            | 9.853                 |                            | 5.135      |
|                            | 3.629        |                            | 15.321                |                            | 5.279      |
|                            | 9.695        |                            | 7.924                 |                            | 5.853      |
|                            | 3.386        |                            | 10.432                |                            | 6.102      |
|                            | 4.319        |                            | 9.419                 |                            | 5.777      |
|                            | 9.065        |                            | 2.219                 |                            | 5.369      |
| 0.1                        | 8.855        | 0.1                        | 15.054                |                            | 5.81       |
|                            | 10.072       |                            | 10.178                | 0.1                        | 6.196      |
|                            | 6.064        |                            | 3.929                 |                            | 6.393      |
|                            | 6.49         |                            | 10.247                |                            | 6.45       |
|                            | 6.991        |                            | 14.689                |                            | 6.362      |
|                            | 3.069        |                            | 10.504                |                            | 6.016      |

|    |       |    |        |    |       |
|----|-------|----|--------|----|-------|
|    | 4.164 |    | 14.723 |    | 4.792 |
|    | 5.94  |    | 7.467  |    | 7.216 |
|    | 6.877 |    | 11.326 |    | 6.111 |
|    | 7.366 |    | 9.186  |    | 6.322 |
|    | 8.202 |    | 10.426 |    | 4.543 |
|    | 5.757 |    | 6.139  |    | 4.454 |
|    | 7.283 |    | 12.989 |    | 6.061 |
|    | 7.096 |    | 6.821  |    | 6.175 |
|    | 5.239 |    | 8.161  |    | 5.783 |
|    | 5.803 |    | 6.795  |    | 5.849 |
|    | 6.966 |    | 6.17   |    | 4.597 |
|    | 4.053 |    | 9.205  |    | 4.428 |
|    | 6.876 |    | 6.853  |    | 5.606 |
|    | 7.345 |    | 9.307  |    | 5.975 |
|    | 6.809 |    | 9.094  |    | 5.708 |
|    | 4.421 |    | 3.709  |    | 4.175 |
|    | 7.108 |    | 6.304  |    | 5.355 |
|    | 5.76  |    | 7.637  |    | 6.112 |
|    | 4.974 |    | 7.614  |    | 5.351 |
|    | 6.665 |    | 12.539 |    | 6.066 |
|    | 8.193 |    | 7.521  |    | 6.003 |
|    | 7.472 |    | 15.916 |    | 4.702 |
|    | 9.81  |    | 4.498  |    | 6.2   |
|    | 7.846 |    | 9.416  |    | 6.742 |
|    | 9.028 |    | 13.452 |    | 5.463 |
|    | 3.792 |    | 5.285  |    | 5.32  |
|    | 5.838 |    | 6.964  |    | 4.79  |
|    | 6.234 |    | 6.823  |    | 3.863 |
|    | 7.726 |    | 8.248  |    | 4.261 |
|    | 4.906 |    | 12.451 |    | 5.381 |
|    | 5.035 |    | 16.024 |    | 6.726 |
|    | 7.263 |    | 9.369  |    | 6.786 |
|    | 9.439 |    | 11.071 |    | 5.267 |
|    | 8.499 |    | 16.729 |    | 4.742 |
|    | 5.55  |    | 4.301  |    | 7.005 |
| 1  | 4.662 | 1  | 13.678 |    | 4.953 |
|    | 6.39  |    | 15.884 |    | 5.575 |
|    | 6.671 |    | 10.26  |    | 5.431 |
|    | 9.21  |    | 5.932  |    | 6.258 |
|    | 8.271 |    | 5.238  |    | 5.51  |
|    | 9.318 |    | 8.883  |    | 5.751 |
|    | 8.574 |    | 6.073  |    | 5.466 |
|    | 8.91  |    | 9.468  | 1  | 5.054 |
|    | 5.018 |    | 13.143 |    | 5.86  |
|    | 6.352 |    | 10.41  |    | 5.709 |
|    | 9.175 |    | 6.825  |    | 4.95  |
|    | 8.241 |    | 11.959 |    | 4.94  |
|    | 7.958 |    | 16.342 |    | 5.922 |
|    | 7.692 |    | 12.88  |    | 5.509 |
|    | 8.581 |    | 11.886 |    | 4.168 |
|    | 9.533 |    | 14.486 |    | 6.179 |
|    | 5.195 |    | 6.08   |    | 6.748 |
|    | 7.366 |    | 6.666  |    | 5.254 |
|    | 9.025 |    | 6.007  |    | 6.066 |
|    | 6.533 |    | 6.751  |    | 5.204 |
| 10 | 9.462 | 10 | 7.872  |    | 5.328 |
|    | 7.862 |    | 9.316  |    | 5.136 |
|    | 4.235 |    | 4.242  |    | 6.254 |
|    | 7.632 |    | 13.246 |    | 5.487 |
|    | 6.29  |    | 11.364 |    | 6.281 |
|    | 8.844 |    | 3.687  | 10 | 5.632 |
|    | 5.632 |    | 10.271 |    | 5.356 |



|     |        |     |        |     |       |
|-----|--------|-----|--------|-----|-------|
|     | 7.186  |     | 9.108  |     | 5.869 |
|     | 5.906  |     | 9.394  |     | 4.608 |
|     | 4.416  |     | 14.322 |     | 5.985 |
|     | 5.894  |     | 13.28  |     | 4.444 |
|     | 3.999  |     | 4.614  |     | 6.445 |
|     | 3.214  |     | 5.427  |     | 4.937 |
|     | 4.019  |     | 6.341  |     | 4.477 |
|     | 4.974  |     | 11.696 |     | 5.084 |
|     | 5.632  |     | 11.101 |     | 4.805 |
|     | 8.568  |     | 12.086 |     | 6.977 |
|     | 3.446  |     | 8.803  |     | 5.853 |
|     | 5.423  |     | 15.886 |     | 4.833 |
|     | 6.473  |     | 11.564 |     | 4.683 |
|     | 7.727  |     | 6.302  |     | 5.295 |
|     | 5.889  |     | 12.957 |     | 4.904 |
|     | 6.005  |     | 13.412 |     | 4.99  |
|     | 4.347  |     | 6.217  |     | 5.297 |
|     | 7.357  |     | 6.507  |     | 5.07  |
|     | 7.678  |     | 10.382 |     | 5.341 |
|     | 9.946  |     | 14.262 |     | 5.605 |
|     | 9.469  |     | 10.414 |     | 5.506 |
|     | 9.507  |     | 10.273 |     | 5.27  |
|     | 10.124 |     | 12.05  |     | 6.002 |
|     | 9.366  |     | 10.146 |     | 5.846 |
|     | 6.35   |     | 3.233  |     | 4.67  |
|     | 4.73   |     | 11.501 |     | 5.095 |
|     | 10.7   |     | 9.005  |     | 6.455 |
|     | 9.152  |     | 8.856  |     | 6.527 |
|     | 10.401 |     | 10.214 |     | 3.877 |
|     | 7.217  |     | 7.816  |     | 7.217 |
|     | 9.631  |     | 8.934  |     | 5.684 |
|     | 7.183  |     | 4.807  |     | 6.033 |
|     | 7.703  |     | 8.236  |     | 6.594 |
|     | 4.626  |     | 7.94   |     | 5.623 |
| 100 | 9.55   | 100 | 2.338  |     | 5.781 |
|     | 8.173  |     | 8.674  |     | 6.844 |
|     | 5.755  |     | 4.266  |     | 5.987 |
|     | 9.456  |     | 11.683 |     | 6.358 |
|     | 4.03   |     | 14.05  |     | 6.089 |
|     | 9.126  |     | 4.572  | 100 | 4.699 |
|     | 5.585  |     | 8.748  |     | 7.308 |
|     | 7.555  |     | 5.87   |     | 6.877 |
|     | 7.731  |     | 7.175  |     | 6.521 |
|     | 7.762  |     | 12.799 |     | 5.458 |
|     | 6.315  |     | 3.343  |     | 7.134 |
|     | 7.26   |     | 9.426  |     | 5.833 |
|     | 7.637  |     | 9.318  |     | 6.231 |
|     | 2.174  |     | 8.456  |     | 6.038 |
|     | 4.096  |     | 11.869 |     | 5.702 |
|     | 4.537  |     | 12.8   |     | 5.517 |
|     |        |     |        |     | 5.492 |
|     |        |     |        |     | 6.66  |
|     |        |     |        |     | 3.989 |
|     |        |     |        |     | 6.343 |
|     |        |     |        |     | 7.488 |
